# Supplementary material
Source: PubMed Central journal article supplement (PMC1356303)
Supplement: 7600862s1.pdf [file 7600862s1.pdf]

**A**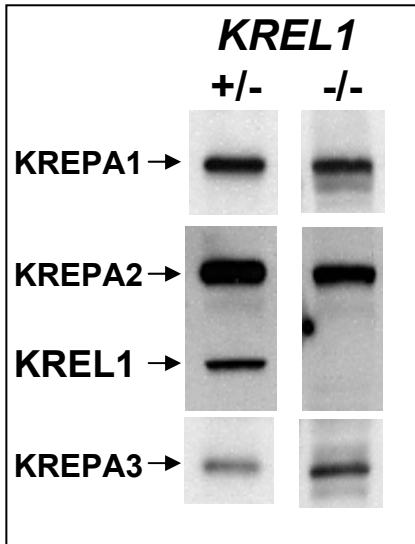**B**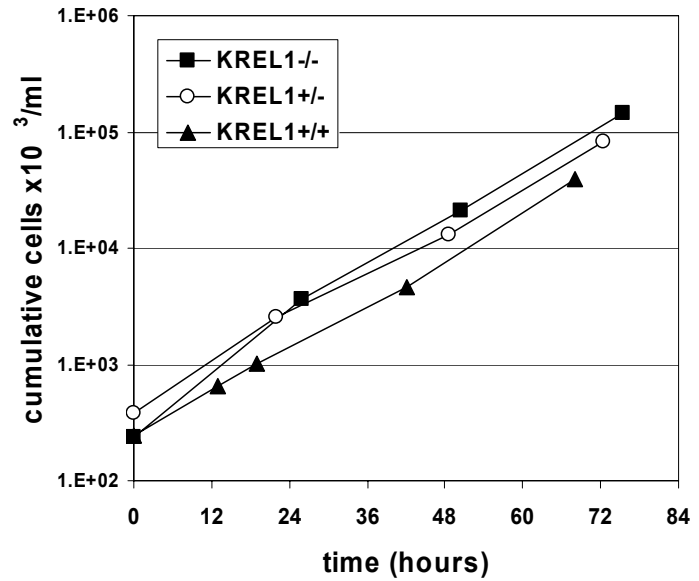

**Supplementary Figure S1** The normally essential RNA editing ligase 1 (KREL1) is not required in the Dk trypanosome *T. evansi* Antat 3/3. **(A)** Western blot analysis of *T. evansi* KREL1<sup>+/-</sup> and KREL1<sup>-/-</sup> cells. Cell lysates were fractionated by SDS-PAGE, transferred to PVDF membrane, and probed with monoclonal antibodies against four components of the mitochondrial RNA editing complex. **(B)** Growth comparison. Cells were maintained in the exponential growth phase and cumulative cell numbers reflect normalization for dilution during cultivation.
