# Supplementary material
Source: PubMed Central journal article supplement (PMC1356303)
Supplement: 7600862s3.pdf [file 7600862s3.pdf]

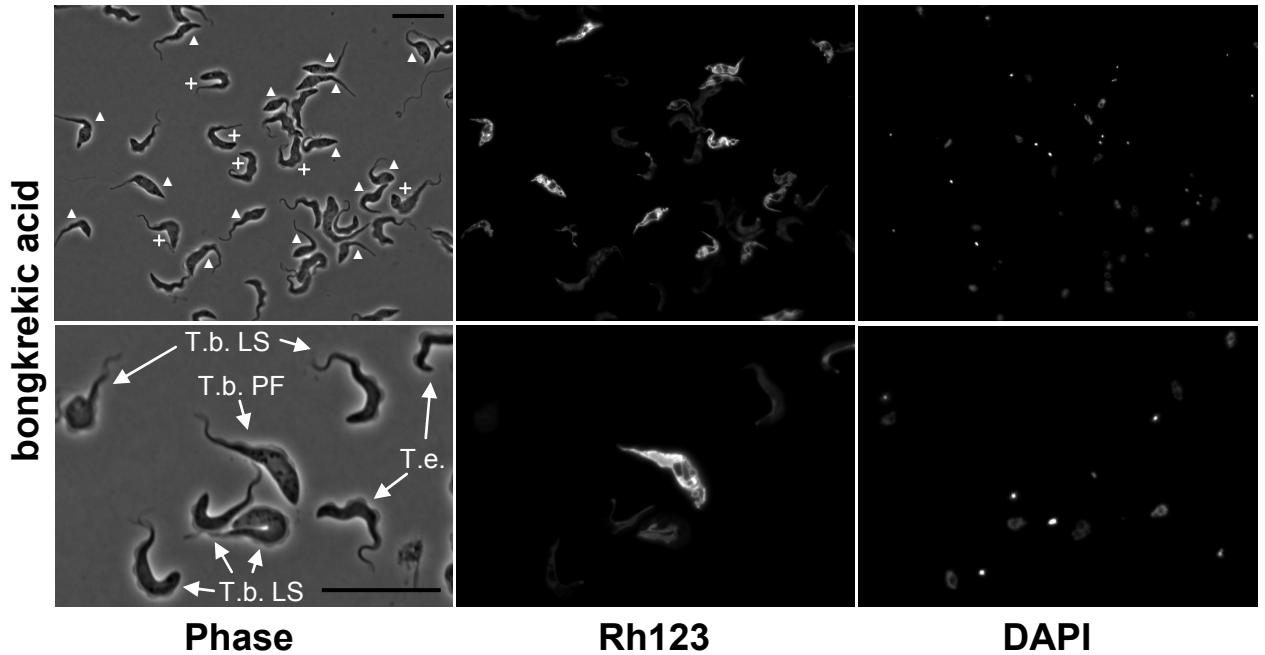

**Supplementary Figure S3** Sensitivity of  $\Delta\Psi_m$  of LS *T. brucei*, *T. evansi*, and procyclic insect form *T. brucei* (PF) to bongkreikic acid, an inhibitor of the ADP/ATP carrier. Cells were incubated with the inhibitor (80  $\mu\text{M}$  for 1 h), stained with Rh123 and DAPI and analyzed by phase contrast and epifluorescence microscopy as described for Supplementary Figure S2. In all panels, the bar represents 20  $\mu\text{m}$ .
