# Supplementary material
Source: PubMed Central journal article supplement (PMC1356303)
Supplement: 7600862s5.pdf [file 7600862s5.pdf]

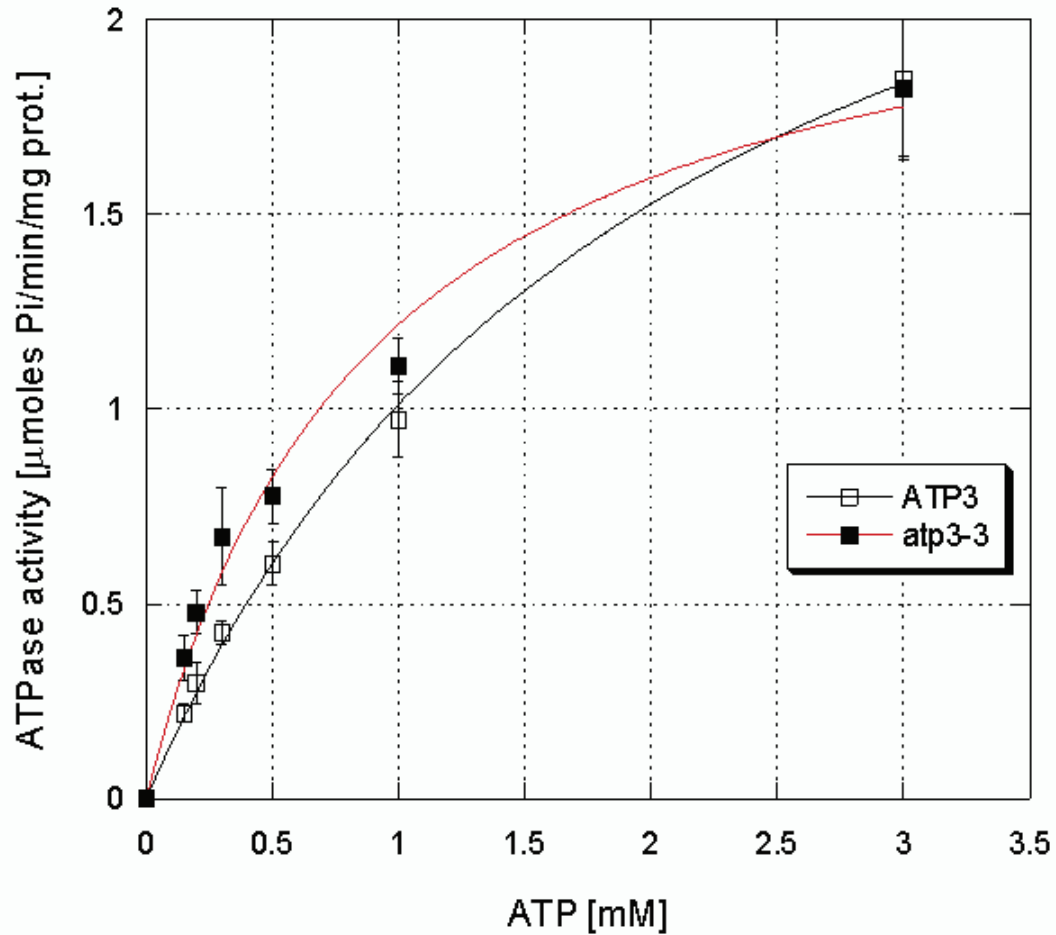

ATP3 (wt)

$m1 = V_{max}$ ,  $m2 = K_m$

| y = $m1 \cdot m0 / (m2 + m0)$ |           |         |
|-------------------------------|-----------|---------|
|                               | Value     | Error   |
| m1                            | 3.1       | 0.11803 |
| m2                            | 2.0623    | 0.14491 |
| Chisq                         | 0.0033263 | NA      |
| R                             | 0.99928   | NA      |

atp3-3

$m1 = V_{max}$ ,  $m2 = K_m$

| y = $m1 \cdot m0 / (m2 + m0)$ |          |         |
|-------------------------------|----------|---------|
|                               | Value    | Error   |
| m1                            | 2.3064   | 0.16012 |
| m2                            | 0.89411  | 0.14024 |
| Chisq                         | 0.028729 | NA      |
| R                             | 0.99306  | NA      |

**Supplementary Figure S5** ATPase activity of isolated *K. lactis* mitochondria. Curves for wild type *K. lactis* (ATP3 □) and the strain expressing the suppressor mutation identified in *T. brucei* Dk164 (atp3-3 ■) have been fitted by a least-squares plot of data obtained from three independent mitochondrial isolations using the Michaelis-Menten equation.
